# Supplementary material for: Selective mechanochemical conversion of post-consumer polyethylene terephthalate waste into hcp and fcu UiO-66 metal–organic frameworks
Source: Royal Society of Chemistry journal article supplement (doi:10.1039/d4mr00126e), 2026-01-01
Supplement: d4mr00126e1.pdf [file d4mr00126e1.pdf]

## *Electronic Supplementary Information*

*for*

### **Selective Mechanochemical Conversion of Post-Consumer Polyethylene Terephthalate Waste into hcp and fcu UiO-66 Metal-Organic Frameworks**

Tomislav Stolar<sup>†\*</sup>, Dilara Bayram<sup>†‡</sup>, Anastasia May<sup>†</sup>, Remie Sundermann<sup>†#</sup>, Carsten Prinz<sup>†</sup>, Klas Meyer<sup>†</sup>, Anett Myxa<sup>†</sup>, Jana Falkenhagen<sup>†</sup>, Franziska Emmerling<sup>†\*</sup>

<sup>†</sup> Federal Institute for Materials Research and Testing (BAM), Richard-Willstätter-Str. 11, 12489 Berlin, Germany.

<sup>‡</sup> Department of Pharmaceutical and Chemical Engineering, Berliner Hochschule für Technik, Berlin 13353, Germany.

<sup>#</sup> IMT Mines Albi, CT Cedex 09, 81013 Albi, France.

E-mail: [tomislav.stolar@bam.de](mailto:tomislav.stolar@bam.de); [franziska.emmerling@bam.de](mailto:franziska.emmerling@bam.de)

#### **Materials**

Terephthalic acid (abcr GmbH), sodium hydroxide (abcr GmbH), potassium hydroxide (abcr GmbH), zirconium(IV) propoxide - 70 wt % 1-propanol solution (abcr GmbH), and methanol (abcr GmbH) were obtained from commercial sources. All chemicals were used as purchased without any further purification. Water was deionized using a milli Q purification system (Merck Millipore, 18.2 MΩ). PET was obtained from commercial transparent plastic bottles and post-consumer textile polyester and subsequently washed, dried, shredded, and milled to powder.

#### **Characterization**

Ex-situ PXRD patterns were obtained by a D8 Advance Diffractometer (Bruker AXS, Karlsruhe, Germany) operating in Bragg-Brentano Geometry and utilizing Cu-K $\alpha$  radiation ( $\lambda = 1.542 \text{ \AA}$ ; step width:  $0.02^\circ$ ). Samples were prepared in custom made PVC sample holders and measured over a range of  $2\theta = 5^\circ$  to  $50^\circ$ .

The IR spectra were recorded with a Nicolet 670 FT-IR (ThermoFisherScientific GmbH) in attenuated total reflection (ATR), with which a "Golden Gate" sample holder was used. After each measurement, the sample holder was cleaned with ethanol and acetone. The background spectrum was measured in air. 32 scans with a resolution of  $4 \text{ cm}^{-1}$  were recorded per measurement. The spectra were recorded in absorption mode in a spectral range of  $4000\text{--}600 \text{ cm}^{-1}$ . The instrument was controlled with OMNIC software.

TGA/DSC measurements were conducted using a METTLER Toledo TGA/DSC 3+ instrument. A sample was subjected to a thermal analysis, being heated from 25 °C to 950 °C in an open 70 µL aluminium oxide crucible with a nitrogen flow of 80 mL/min. The heating rate was set at a rate of 10 °C per minute.

NMR experiments were performed on a 500 MHz NMR spectrometer system (VNMR500, Varian Associates, Palo Alto, USA).

In-situ X-ray diffraction experiments were performed at the µSpot beamline (BESSY II, Helmholtz Centre Berlin for Materials and Energy). The used photon energy amounted to 17.44 keV using a double crystal monochromator (Si 111). The beam was positioned slightly inside of the milling jar, by scanning the wall of the jar and then moving approximately 50 µm inside. The sample detector distance was 229.70 mm. Scattered intensities were collected with a two-dimensional X-ray detector (Eiger 9M, HPC 3110 x 3269 pixel, pixel size 75 x 75 µm) and a time-resolution of 10 s. The obtained scattering images were processed employing an algorithm of the computer program DPDAK.<sup>1</sup> 2D time-resolved plots of in situ monitoring data were created in MATLAB and the background of each diffraction pattern was subtracted prior to plotting using the Sonneveld-Visser algorithm.<sup>2</sup> For comparison, the theoretical XRD patterns of the starting materials and final products were retrieved from the ICSD or CCDC and simulated using Mercury (Version 4.3.0, CCDC).

Raman spectra were recorded using a RamanRXN1 Analyzer<sup>TM</sup> (Kaiser Optical Systems, France) with a system power of 400 mW, utilizing  $\lambda = 765$  nm as an excitation wavelength. The contactless probe was adjusted to a spot size of 1 mm, in a distance of approximately 6 cm from the sample. Each spectrum consists of 5 accumulations of 5 s each. For in-situ measurements, the probe is adjusted onto the filled milling jar (reactants, milling ball and grinding liquid).

For gel permeation chromatography, 1 x PFG linear M 7µm 30 x 0.8 cm and 1 x PL-PFG linear 7 µm 25 x 0,46 cm columns were used. Column temperature was 35°C and eluent was 100% HFIP. Detection was achieved by refractive index, RI (35°C). We used flowrate of 0.5 mL/min and 100 µL of injection volume. Calibration was performed using 9 PMMA Standards (150 to 8,1x10<sup>5</sup> g/mol) (PSS, now Agilent). Semi-quantitative estimation of PET content was performed by comparing detector response intensities for the starting PET and the sample. To enable that, same concentration of the PET from the starting reference and that in the sample was used (assuming no depolymerization).

For gas adsorption measurements, samples were first activated by soaking in MeOH for 6 h and exchanging the supernatant with fresh MeOH. After exchanging the supernatant three times, samples were dried under vacuum oven at 60 °C. The samples were then degassed under dynamic vacuum on a SmartVacPrep at 120 °C for 12 h or until the outgassing rate of  $\leq 0.02$  mm Hg min<sup>-1</sup> was reached. The nitrogen isotherms of the activated samples were then measured on ASAP 2020 instrument from Micromeritics at 77 K with liquid nitrogen bath. Specific surface areas were determined and calculated from the adsorption branch of the isotherm using the Brunauer, Emmett, and Teller (BET) method.<sup>3</sup>

#### Mechanochemical synthesis of disodium terephthalate

In a typical synthesis, a 1:2 stoichiometric amount of PET (0.55 mmol, 106.6 mg), calculated by its monomer-equivalent, and NaOH (1.1 mmol, 44.4 mg) were placed in a 4 mL milling jar (stainless steel caps and PMMA central part) together with 100 µL of H<sub>2</sub>O and one stainless steel milling ball (8mm, 1.83 g). The mechanochemical synthesis was carried out using a vertical ball mill (Pulverisette 23, FRITSCH GmbH, Germany) at 50 Hz for 2 hours. The obtained white wet paste was dried for 1h in an oven at 60°C and ground into a fine powder for analysis by PXRD.

#### Mechanochemical synthesis of dipotassium terephthalate

In a typical synthesis, a 1:2 stoichiometric amount of PET (0.49 mmol, 94.7 mg), calculated by its monomer-equivalent, and KOH (0.99 mmol, 55.3 mg) were placed in a 4 mL milling jar together and 100  $\mu$ L of H<sub>2</sub>O and one stainless steel milling ball (8mm, 1.83 g). The mechanochemical synthesis was performed using a vertical ball mill (Pulverisette 23, FRITSCH GmbH, Germany) at 50 Hz for 2 hours. The obtained white wet paste was dried for 1h in an oven at 60°C and ground into a fine powder for analysis by PXRD.

#### Mechanochemical synthesis of disodium terephthalate (1 g scale) from waste PET

The gram-scale mechanochemical synthesis of disodium terephthalate was conducted using a 10 mL stainless steel milling jar with one 10 mm stainless steel milling ball. PET (704 mg) and NaOH (294 mg) were added to the milling jar together with the addition of 667  $\mu$ L of H<sub>2</sub>O. The synthesis was carried out using a vertical ball mill (Pulverisette 23, FRITSCH GmbH, Germany) at a frequency of 50 Hz for 4 h. The obtained wet paste, white or red (depending on the source), respectively, was dried for 1 h in an oven at 60°C and ground using a mortar and pestle into a fine powder for analysis by PXRD. To remove ethylene glycol, disodium terephthalate was washed with iPrOH and dried for 1 h at 60°C.

The disodium terephthalate obtained from the red polyester textile was de-colored and purified. The material was suspended in 50 mL of H<sub>2</sub>O. The unreacted solid residue was then filtered out. To remove the dye, activated carbon powder was added to the aqueous filtrate containing disodium terephthalate and heated for 10 minutes under reflux. The activated carbon was removed by filtration. Water was removed by rotary evaporation. The resulting powder was dried for 1 h in an oven at 60 °C and ground using a mortar and pestle into a fine powder for analysis by PXRD. We isolated 470 mg of disodium terephthalate starting from 704 mg of red textile sample (63% yield). To remove ethylene glycol, disodium terephthalate was washed with iPrOH and dried for 1 h at 60°C.

#### Mechanochemical synthesis of dipotassium terephthalate (1 g scale)

The gram-scale mechanochemical synthesis of dipotassium terephthalate was conducted using a 10 mL stainless steel milling jar with one 10 mm stainless steel milling ball. PET (631 mg) and KOH (369 mg) were added to the milling jar together with the addition of 667  $\mu$ L of H<sub>2</sub>O. The synthesis was carried out using a vertical ball mill (Pulverisette 23, FRITSCH GmbH, Germany) at a frequency of 50 Hz for 2 h. The obtained white waxy substance was dried for 1h in an oven at 60°C and ground into a fine powder for analysis by PXRD.

#### Synthesis of (Zr<sub>6</sub>O<sub>4</sub>(OH)<sub>4</sub>(CH<sub>3</sub>COO)<sub>12</sub>)<sub>2</sub> (zirconium acetate cluster)

Zirconium (IV) propoxide (70 wt % 1-propanol solution) (3 mL) was mixed with 10.5 mL of acetic acid in a sealed beaker. The mixture was left overnight at room temperature and the resulting colorless microcrystalline powder was collected by filter suction and washed with acetic acid. After drying at room temperature, a fine colorless powder with a yield of 2.65 g, 85% (based on zirconium (IV) propoxide) was obtained.

#### Mechanochemical synthesis of UiO-66 from Na<sub>2</sub>TP

Zirconium acetate cluster (0.0385 mmol, 131 mg) and disodium terephthalate (0.304 mmol, 63.9 mg) were transferred into a 4 mL jar (stainless steel ends and PMMA central part). H<sub>2</sub>O (98  $\mu$ L) and TEA (42  $\mu$ L, 1 equiv.) were added, or 140  $\mu$ L of H<sub>2</sub>O without TEA, respectively. The reagents were milled for 120 min at 50 Hz using one 8 mm stainless steel ball. The obtained product was washed with water and MeOH and analyzed by PXRD (isolated 120 mg).

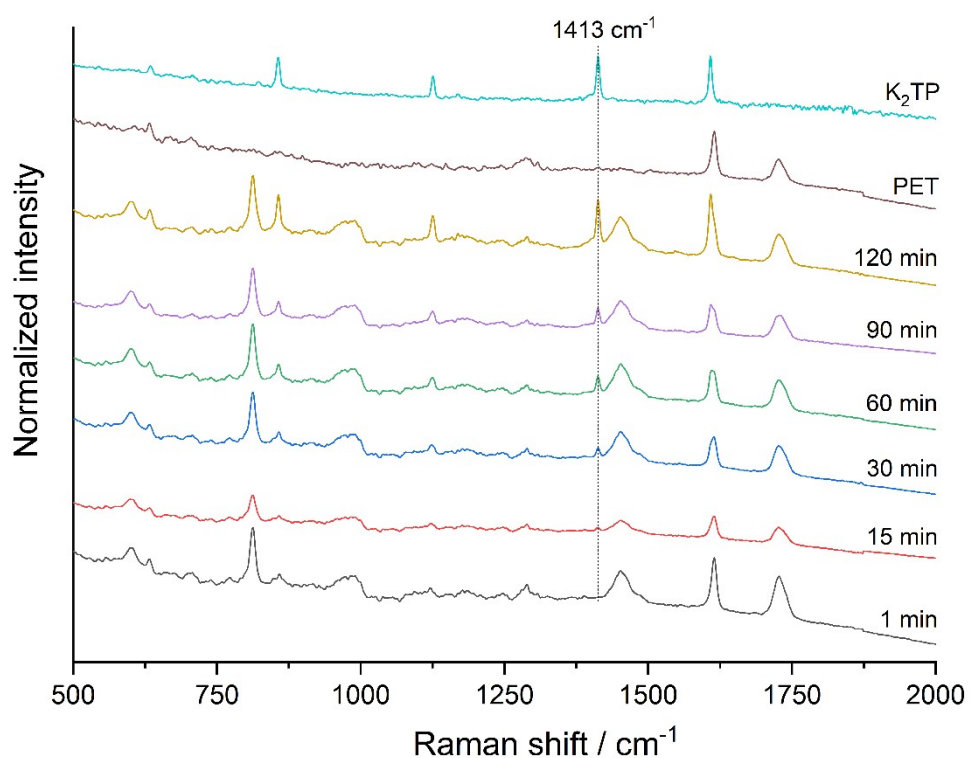

**Figure S1.** Time-resolved *in situ* Raman monitoring of milling PET (0.49 mmol, 94.7 mg), KOH (0.99 mmol, 55.3 mg), and 100  $\mu$ L of  $H_2O$ . The reaction was performed in a 4 mL milling jar (stainless steel caps and PMMA central part) together with one stainless steel milling ball (8mm, 1.83 g).

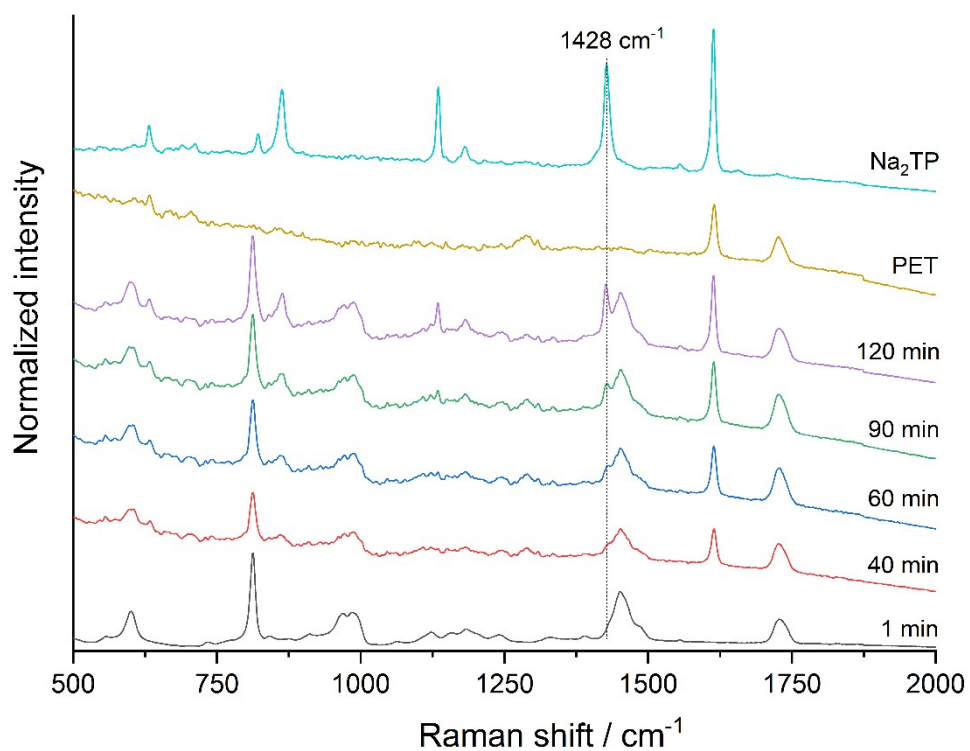

**Figure S2.** Time-resolved *in situ* Raman monitoring of milling PET (0.55 mmol, 106.6 mg), NaOH (1.1 mmol, 44.4 mg), and 100  $\mu$ L of H<sub>2</sub>O. The reaction was performed in a 4 mL milling jar (stainless steel caps and PMMA central part) together with one stainless steel milling ball (8mm, 1.83 g).

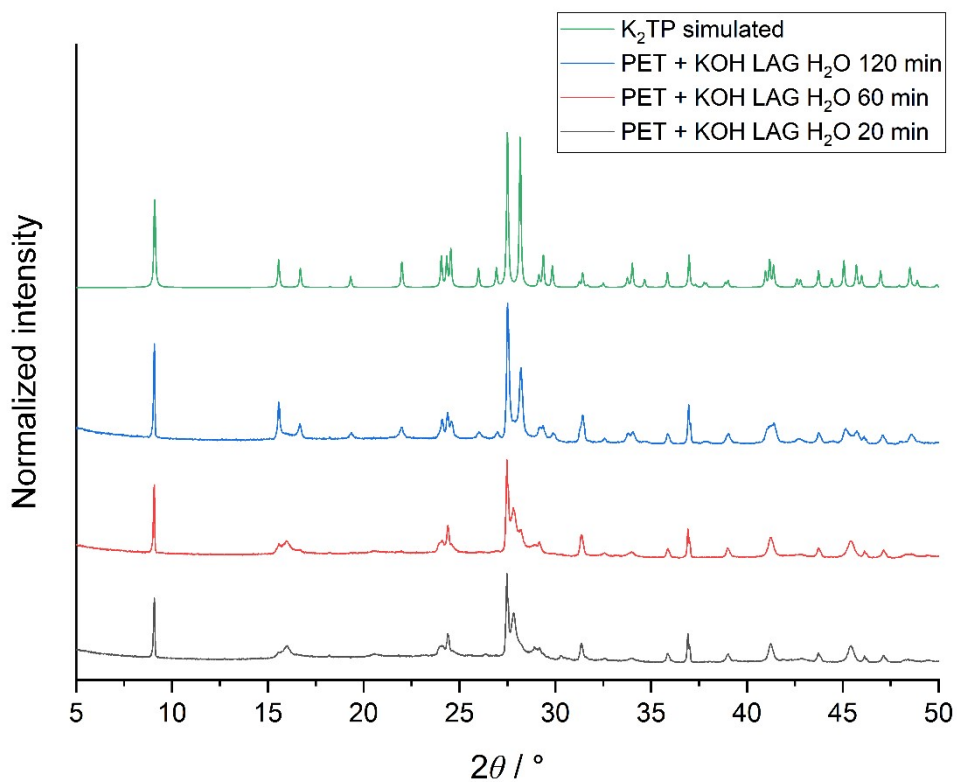

**Figure S3.** PXRD patterns for milling PET with KOH under different LAG conditions ( $\lambda = 1.542 \text{ \AA}$ ).

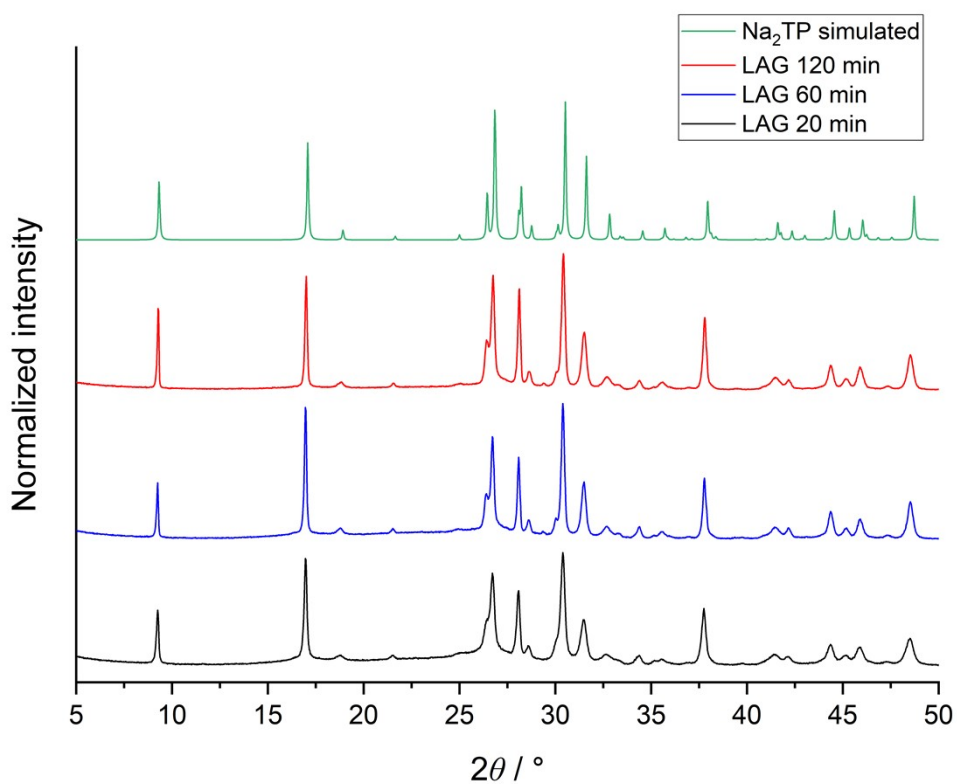

**Figure S4.** PXRD patterns for milling PET with NaOH under different LAG conditions ( $\lambda = 1.542 \text{ \AA}$ ).

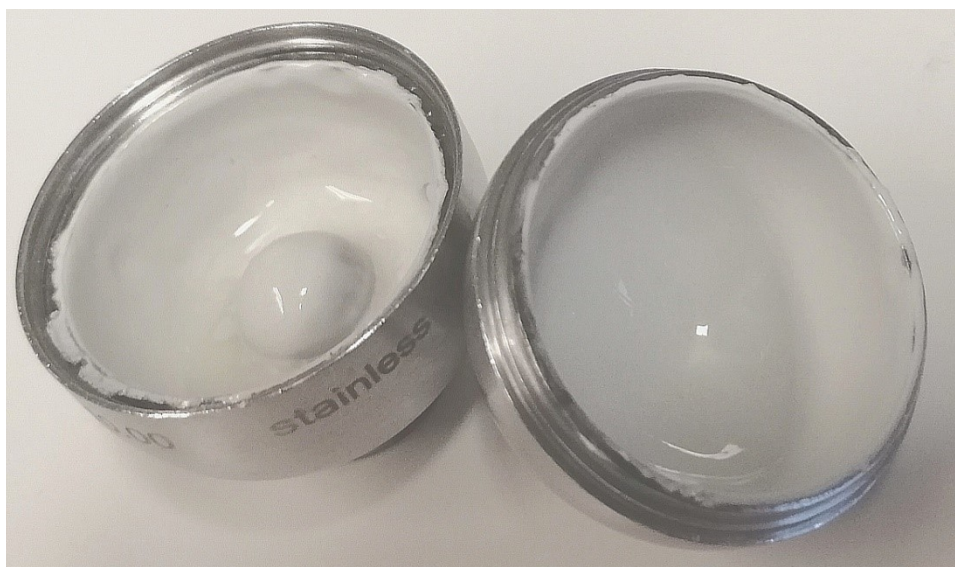

**Figure S5.** Photograph of the product of milling PET (704 mg), NaOH (294 mg), and 667  $\mu\text{L}$  of  $\text{H}_2\text{O}$  at a frequency of 50 Hz for 2 h. 10 mL stainless steel milling jar with one 10 mm stainless steel milling ball was used.

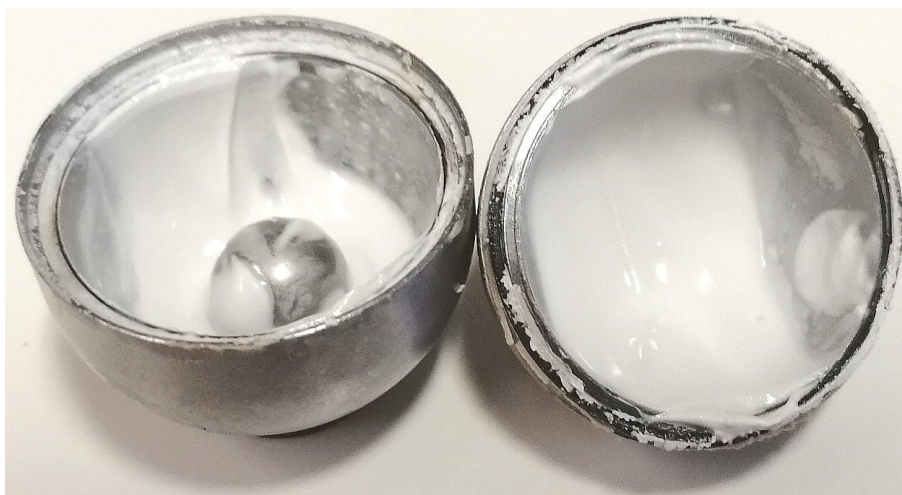

**Figure S6.** Photograph of the product of milling PET (631 mg), KOH (369 mg), and 667  $\mu\text{L}$  of  $\text{H}_2\text{O}$  at a frequency of 50 Hz for 2 h. 10 mL stainless steel milling jar with one 10 mm stainless steel milling ball was used.

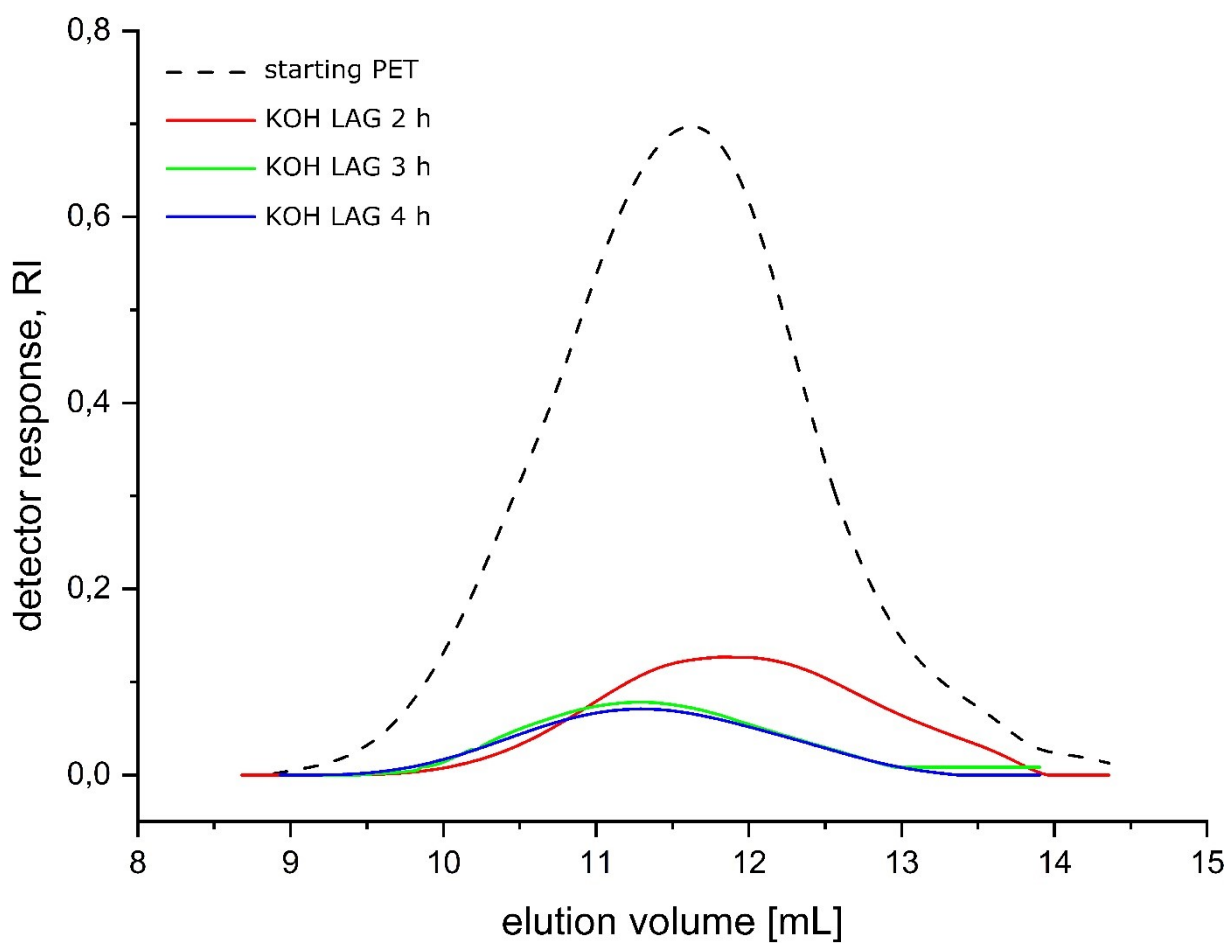

**Figure S7.** GPC chromatograms for milling PET with KOH under LAG conditions with  $\text{H}_2\text{O}$ .



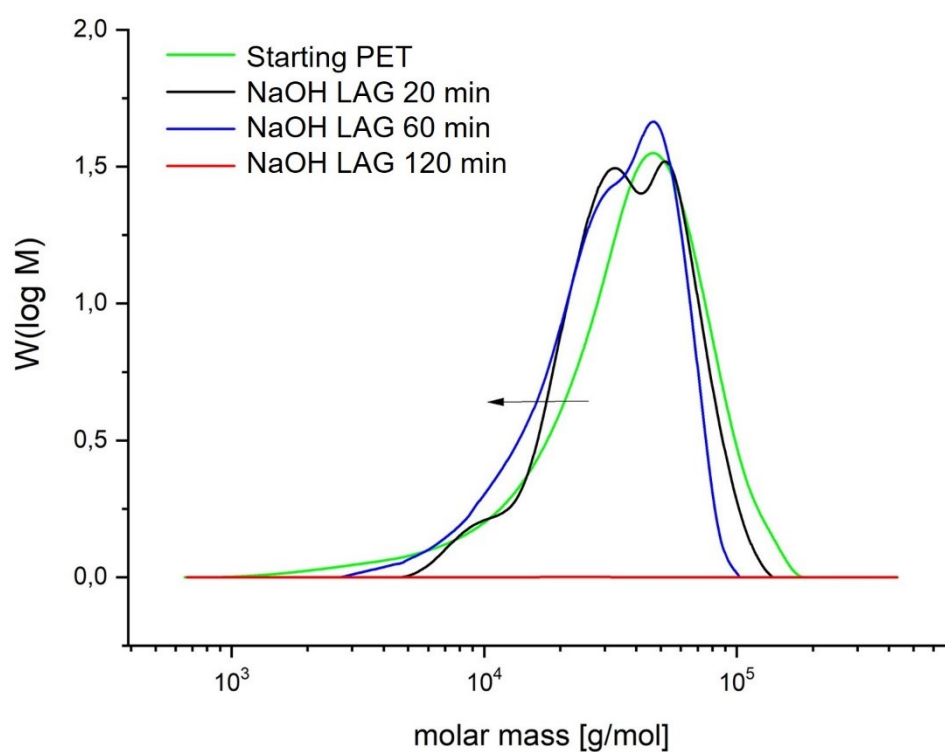

**Figure S8.** GPC chromatograms showing molar mass distribution for milling PET with NaOH under LAG conditions with H<sub>2</sub>O.

**Table S1.** Number average ( $M_n$ ), weight average ( $M_w$ ), and dispersity ( $\mathcal{D}$ ) for milling PET with NaOH under LAG conditions with H<sub>2</sub>O (Figure S8).

| sample           | $M_n$<br>[kg/mol] | $M_w$<br>[kg/mol] | $\mathcal{D}$ |
|------------------|-------------------|-------------------|---------------|
| Starting PET     | 21                | 38                | 1.8           |
| NaOH LAG 20 min  | 24                | 39                | 1.5           |
| NaOH LAG 60 min  | 21                | 36                | 1.7           |
| NaOH LAG 120 min | -                 | -                 | -             |



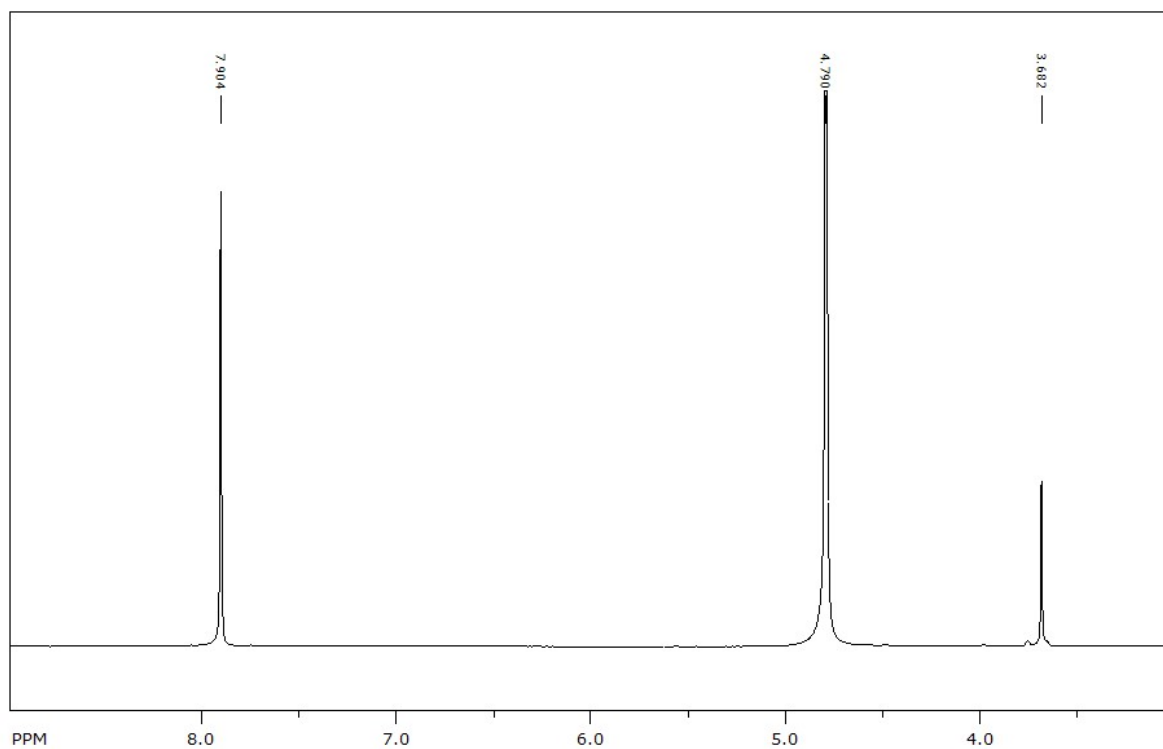

**Figure S9.** <sup>1</sup>H spectra of unwashed Na<sub>2</sub>TP in D<sub>2</sub>O (EG peak at 3.68 ppm).

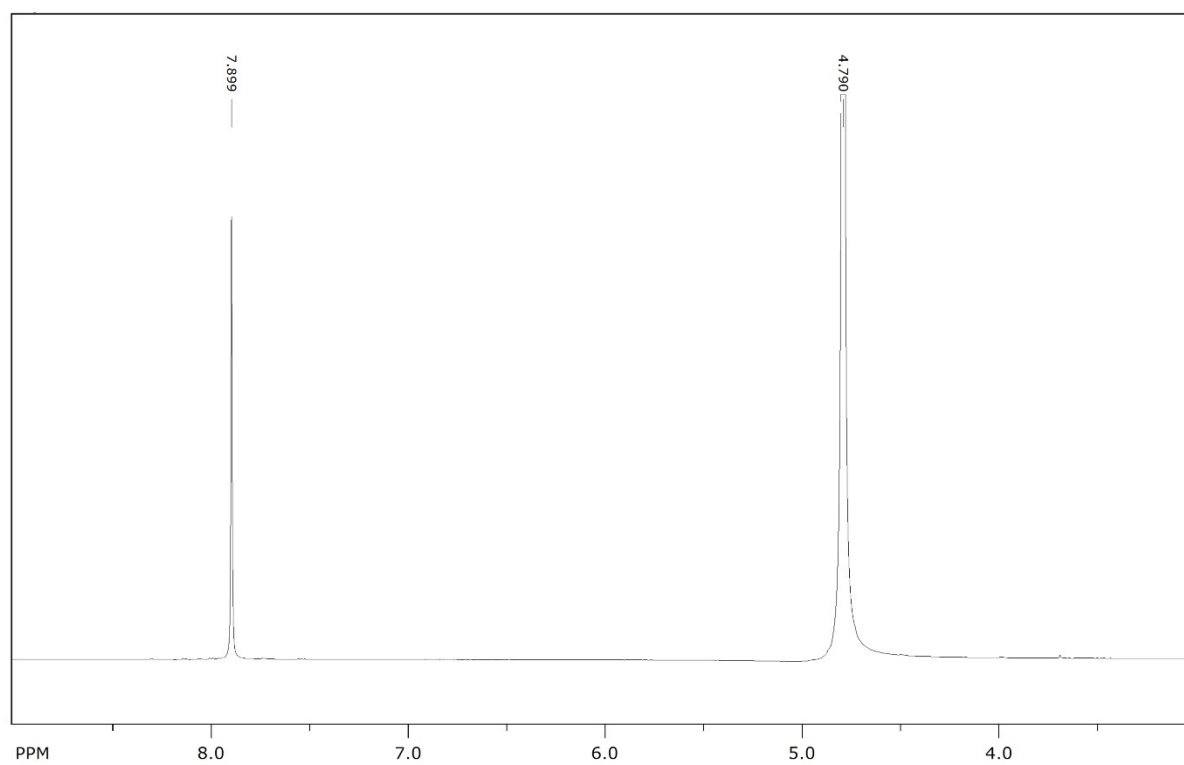

**Figure S10.** <sup>1</sup>H spectra of washed Na<sub>2</sub>TP in D<sub>2</sub>O (no EG peaks).

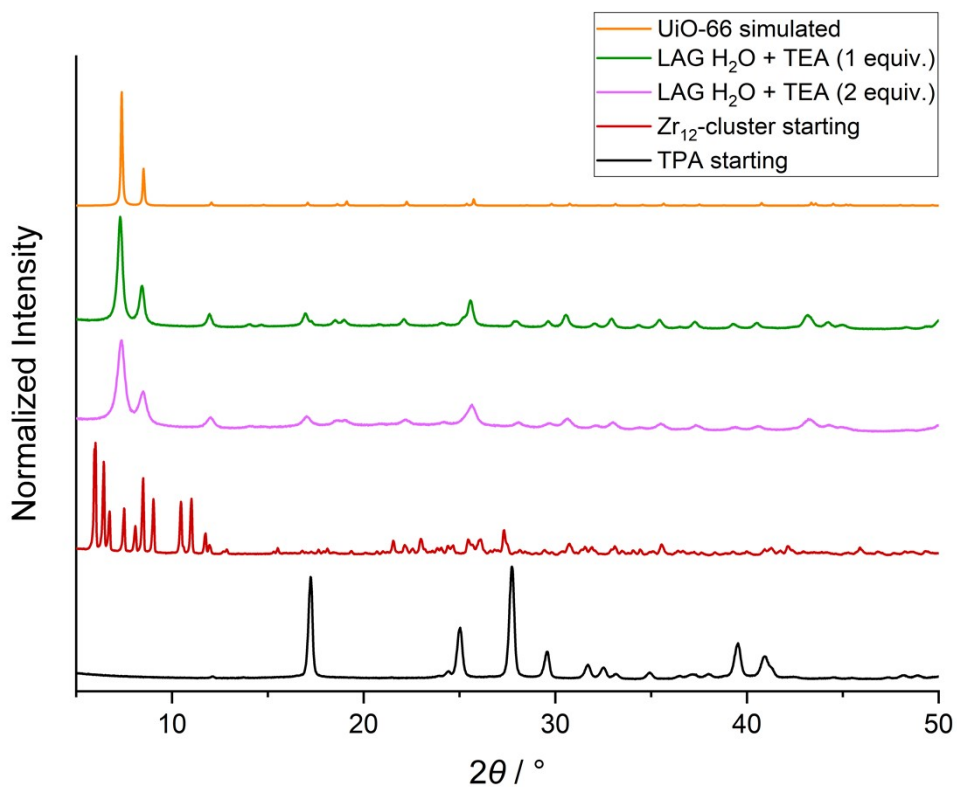

**Figure S11.** PXRD patterns for mechanochemical synthesis of UiO-66 starting from TPA ( $\lambda = 1.542 \text{ \AA}$ ).

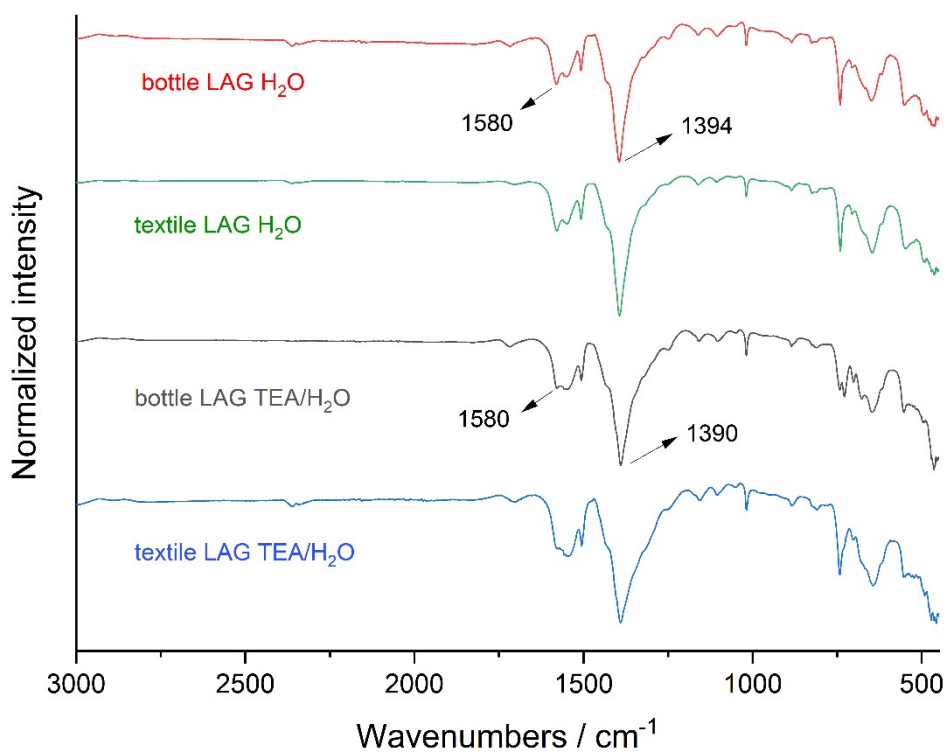

**Figure S12.** FTIR spectra of hcp UiO-66 samples (red and green) and fcu UiO-66 samples (grey and blue).

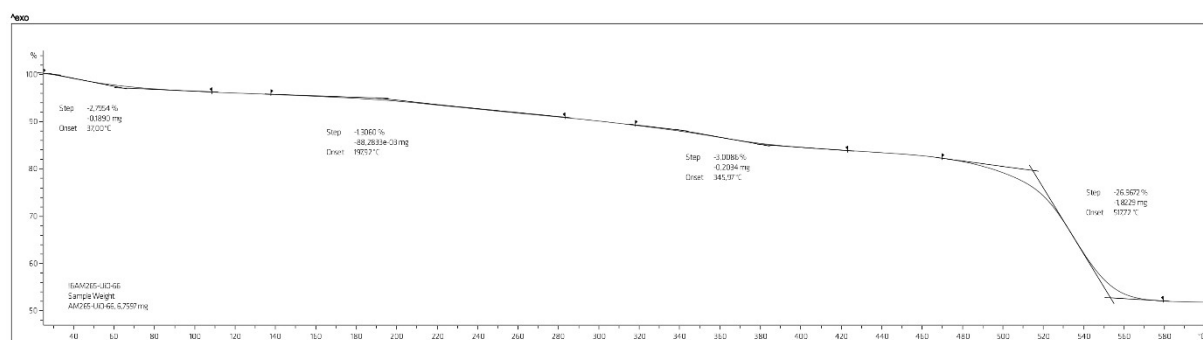

**Figure S13.** TGA curve for fcu UiO-66 (bottle LAG TEA/H<sub>2</sub>O) obtained by milling washed and dried Na<sub>2</sub>TP (0.304 mmol, 63.9 mg), obtained after milling PET bottle with NaOH, with zirconium acetate cluster (0.0385 mmol, 131 mg), 42  $\mu$ L of triethylamine (one equiv.), and 98  $\mu$ L of H<sub>2</sub>O.

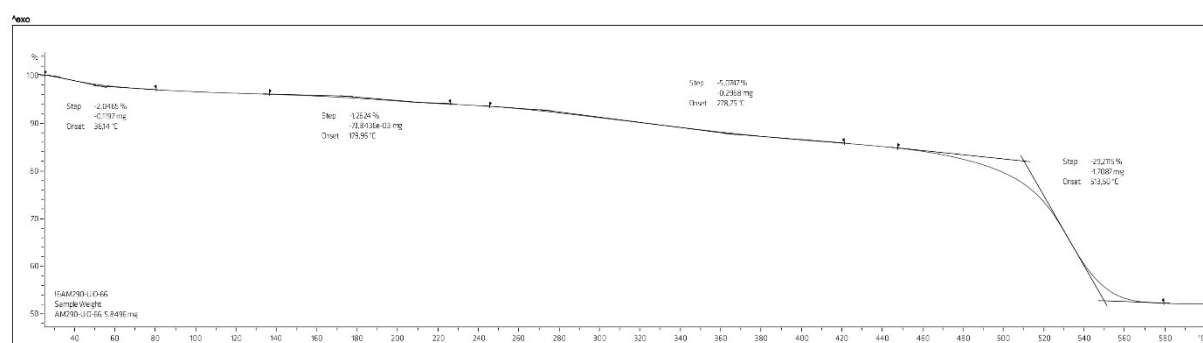

**Figure S14.** TGA curve for hcp UiO-66 (bottle LAG H<sub>2</sub>O) obtained by milling washed and dried Na<sub>2</sub>TP (0.304 mmol, 63.9 mg), obtained after milling PET bottle with NaOH, with zirconium acetate cluster (0.0385 mmol, 131 mg), and 140  $\mu$ L of H<sub>2</sub>O.

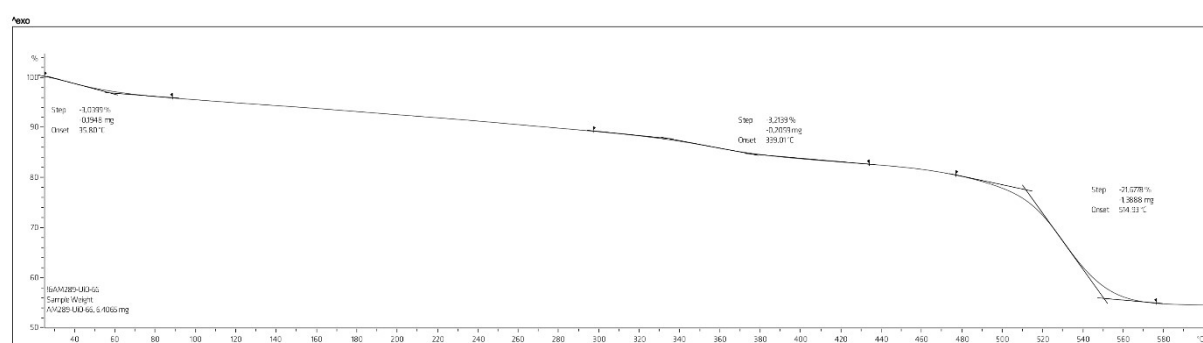

**Figure S15.** TGA curve for fcu UiO-66 (textile LAG TEA/H<sub>2</sub>O) obtained by milling washed and dried Na<sub>2</sub>TP (0.304 mmol, 63.9 mg), obtained after milling PET red textile with NaOH, with zirconium acetate cluster (0.0385 mmol, 131 mg), 42  $\mu$ L of triethylamine (one equiv.), and 98  $\mu$ L of H<sub>2</sub>O.

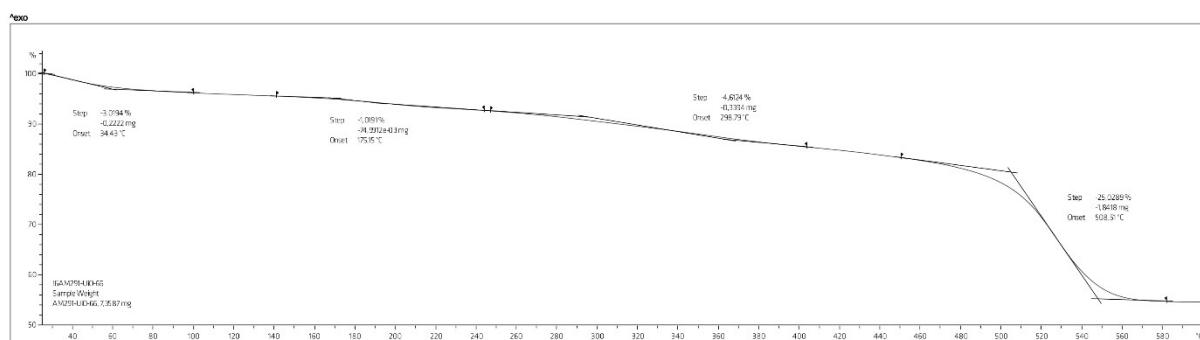

**Figure S16.** TGA curve for hcp UiO-66 (textile LAG H<sub>2</sub>O) obtained by milling washed and dried Na<sub>2</sub>TP (0.304 mmol, 63.9 mg), obtained after milling PET red textile with NaOH, with zirconium acetate cluster (0.0385 mmol, 131 mg), and 140  $\mu$ L of H<sub>2</sub>O.

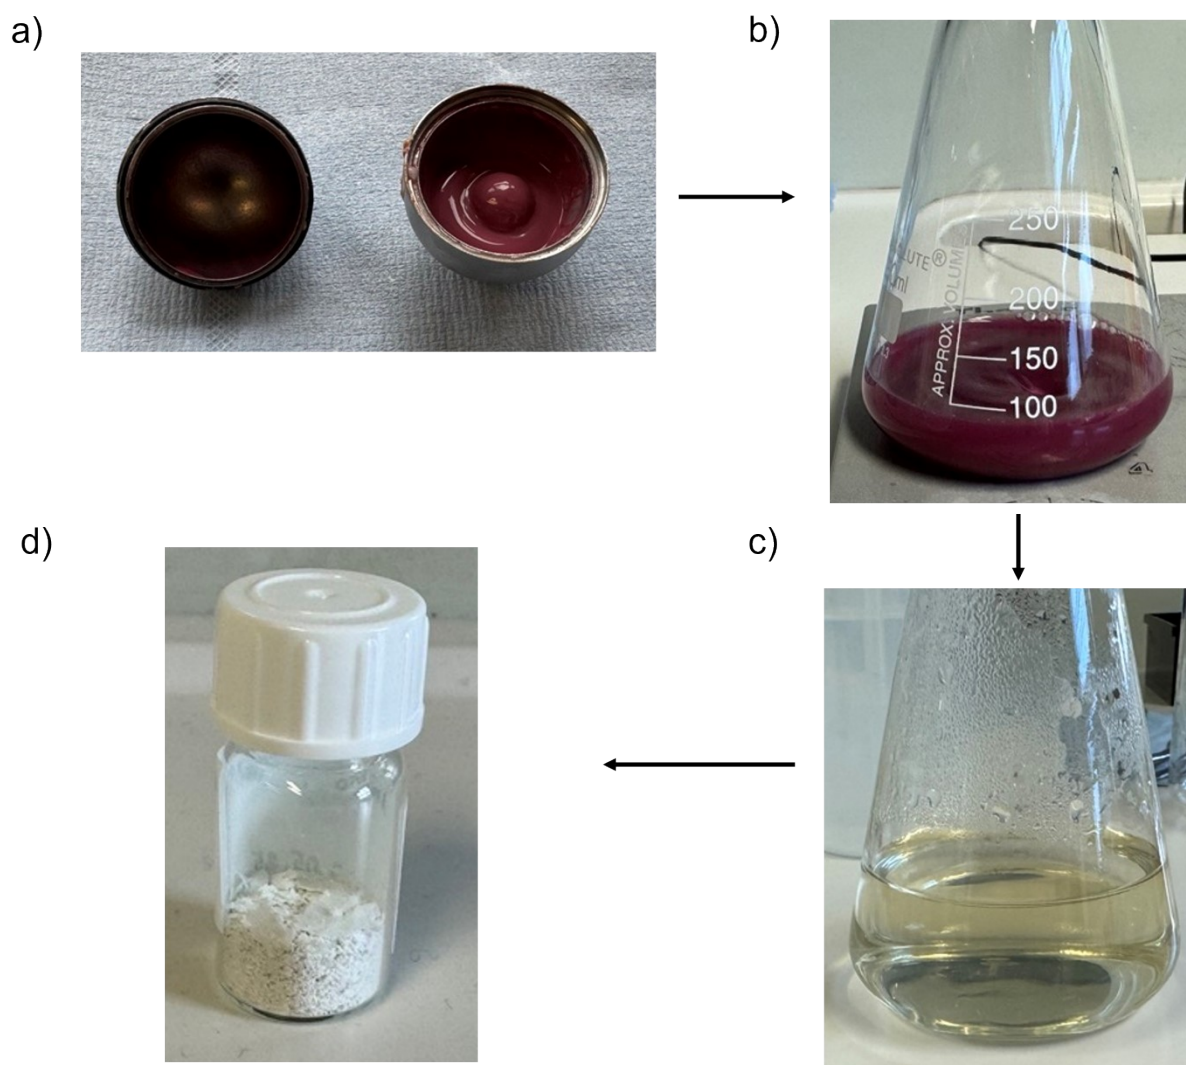

**Figure S17.** Workflow for decolorization: a) red textile polyester/PET after depolymerization reaction with NaOH, b) product mixture with activated carbon powder after heating, c) product mixture after the filtration, d) isolated Na<sub>2</sub>TP after water evaporation, washing, and drying.

| BET Surface Area Report                                |                                               |                              |
|--------------------------------------------------------|-----------------------------------------------|------------------------------|
| BET Surface Area: 777.7039 ± 1.2940 m <sup>2</sup> /g  |                                               |                              |
| Slope: 0.005592 ± 0.000009 g/cm <sup>3</sup> STP       |                                               |                              |
| Y-Intercept: 0.000006 ± 0.000000 g/cm <sup>3</sup> STP |                                               |                              |
| C: 1011.248369                                         |                                               |                              |
| Qm: 178.6511 cm <sup>3</sup> /g STP                    |                                               |                              |
| Correlation Coefficient: 0.9999958                     |                                               |                              |
| Molecular Cross-Sectional Area: 0.1620 nm <sup>2</sup> |                                               |                              |
| Relative Pressure<br>(p/p <sup>o</sup> )               | Quantity Adsorbed<br>(cm <sup>3</sup> /g STP) | 1/[Q(p <sup>o</sup> /p - 1)] |
| 0.009917692                                            | 164.9272                                      | 0.000061                     |
| 0.020891140                                            | 173.8681                                      | 0.000123                     |
| 0.029150391                                            | 178.0261                                      | 0.000169                     |
| 0.039733933                                            | 181.8965                                      | 0.000227                     |
| 0.051487062                                            | 184.9619                                      | 0.000293                     |

**Figure S18.** BET report from the nitrogen adsorption measurement for fcu UiO-66 (bottle LAG TEA/H<sub>2</sub>O).

| BET Surface Area Report                                |                                               |                              |
|--------------------------------------------------------|-----------------------------------------------|------------------------------|
| BET Surface Area: 733.8013 ± 0.7358 m <sup>2</sup> /g  |                                               |                              |
| Slope: 0.005921 ± 0.000006 g/cm <sup>3</sup> STP       |                                               |                              |
| Y-Intercept: 0.000011 ± 0.000000 g/cm <sup>3</sup> STP |                                               |                              |
| C: 534.000181                                          |                                               |                              |
| Qm: 168.5660 cm <sup>3</sup> /g STP                    |                                               |                              |
| Correlation Coefficient: 0.9999985                     |                                               |                              |
| Molecular Cross-Sectional Area: 0.1620 nm <sup>2</sup> |                                               |                              |
| Relative Pressure<br>(p/p <sup>o</sup> )               | Quantity Adsorbed<br>(cm <sup>3</sup> /g STP) | 1/[Q(p <sup>o</sup> /p - 1)] |
| 0.021490122                                            | 159.0123                                      | 0.000138                     |
| 0.032087223                                            | 164.6214                                      | 0.000201                     |
| 0.039664296                                            | 167.7973                                      | 0.000246                     |
| 0.051541462                                            | 171.9143                                      | 0.000316                     |
| 0.078340951                                            | 178.9515                                      | 0.000475                     |

**Figure S19.** BET report from the nitrogen adsorption measurement for hcp UiO-66 (bottle LAG H<sub>2</sub>O).

| BET Surface Area Report                                         |                                                     |                        |
|-----------------------------------------------------------------|-----------------------------------------------------|------------------------|
| BET Surface Area: $804.3785 \pm 1.4370 \text{ m}^2/\text{g}$    |                                                     |                        |
| Slope: $0.005406 \pm 0.000010 \text{ g/cm}^3 \text{ STP}$       |                                                     |                        |
| Y-Intercept: $0.000006 \pm 0.000000 \text{ g/cm}^3 \text{ STP}$ |                                                     |                        |
| C: 962.485301                                                   |                                                     |                        |
| Qm: $184.7787 \text{ cm}^3/\text{g STP}$                        |                                                     |                        |
| Correlation Coefficient: 0.9999952                              |                                                     |                        |
| Molecular Cross-Sectional Area: $0.1620 \text{ nm}^2$           |                                                     |                        |
| Relative Pressure<br>( $p/p^\circ$ )                            | Quantity Adsorbed<br>( $\text{cm}^3/\text{g STP}$ ) | $1/[Q(p^\circ/p - 1)]$ |
| 0.009896400                                                     | 169.9167                                            | 0.000059               |
| 0.020734042                                                     | 179.2728                                            | 0.000118               |
| 0.029353146                                                     | 183.9039                                            | 0.000164               |
| 0.039981724                                                     | 187.9527                                            | 0.000222               |
| 0.051493682                                                     | 191.1655                                            | 0.000284               |

**Figure S20.** BET report from the nitrogen adsorption measurement for fcu UiO-66 (textile LAG TEA/H<sub>2</sub>O).

| BET Surface Area Report                                         |                                                     |                        |
|-----------------------------------------------------------------|-----------------------------------------------------|------------------------|
| BET Surface Area: $807.5308 \pm 1.1570 \text{ m}^2/\text{g}$    |                                                     |                        |
| Slope: $0.005379 \pm 0.000008 \text{ g/cm}^3 \text{ STP}$       |                                                     |                        |
| Y-Intercept: $0.000011 \pm 0.000000 \text{ g/cm}^3 \text{ STP}$ |                                                     |                        |
| C: 478.776212                                                   |                                                     |                        |
| Qm: $185.5028 \text{ cm}^3/\text{g STP}$                        |                                                     |                        |
| Correlation Coefficient: 0.9999969                              |                                                     |                        |
| Molecular Cross-Sectional Area: $0.1620 \text{ nm}^2$           |                                                     |                        |
| Relative Pressure<br>( $p/p^\circ$ )                            | Quantity Adsorbed<br>( $\text{cm}^3/\text{g STP}$ ) | $1/[Q(p^\circ/p - 1)]$ |
| 0.020746233                                                     | 173.0236                                            | 0.000122               |
| 0.028643726                                                     | 178.0629                                            | 0.000166               |
| 0.039466207                                                     | 183.5207                                            | 0.000224               |
| 0.051564900                                                     | 188.3780                                            | 0.000289               |
| 0.078074240                                                     | 196.4232                                            | 0.000431               |

**Figure S21.** BET report from the nitrogen adsorption measurement for hcp UiO-66 (textile LAG H<sub>2</sub>O).

## References

- 1) G. Benecke, W. Wagermaier, C. Li, M. Schwartzkopf, G. Flucke, R. Hoerth, I. Zizak, M. Burghammer, E. Metwalli, P. Müller-Buschbaum, M. Trebbin, S. Förster, O. Paris, S. V. Roth and P. Fratzl, J. Appl. Crystallogr., 2014, 47, 1797–1803.
- 2) J. Sonneveld, J. W. Visser, J. Appl. Crystallogr. 1975, 8, 1–7.
- 3) Brunauer, S., Emmet, P. H., Teller, E. Adsorption of Gases in Multimolecular Layers. J. Amer. Chem. Soc., 60 (1938) 309 – 319.
